# Supplementary material for: Integration of heterogeneous functional genomics data in gerontology research to find genes and pathway underlying aging across species
Source: PLoS One. 2019 Apr 12;14(4):e0214523. doi: 10.1371/journal.pone.0214523 (PMC6461221; doi:10.1371/journal.pone.0214523)
Supplement: S2 Table — (XLSX) [file pone.0214523.s002.xlsx]

## Sheet: Sheet1
Names			p-value	Overlap
UVC-Induced MAPK Signaling			5.52 x 10-12	0.102	5/49
Chemokine Signaling			1.7 x 10-8	0.052	4/77
BMP Signaling pathway			2.2 x 10-8	0.049	4/82
IL-17 Sigtnaling Pathway			3.69 x 10-8	0.043	4/93
TGF-B Signaling Pathway			3.69 x 10-8	0.043	4/93
